# Supplementary material for: A novel modified VBQ Score，Correlation with the Vertebral Bone Quality Score, independently assessing for bone quality in patients with Osteoporosis Vertebral Fracture
Source: Research Square preprint supplement (doi:10.21203/rs.3.rs-4695580/v1), 2024-10-16
Supplement: Supplementary file 1 [file 3f33cf5d0c22df5b9df754b1.docx]

| non-fracture group fracture group P |
| --- |
| Demographic factors  Total (n = 206) 103 103  *Age (years) 68.6±8.2 69.38±8.45 0.665*  *BMI (kg/m2) 24.80±3.72 23.10±3.21 <0.001*  *Female 61（59.2%） 84（81.6%） <0.001*  *Previous fracturey 5（4.9%） 16（15.5%） 0.011*  Comorbidities（%）  *Hypertension 57（55.3%） 34（33.0%） 0.001*  *Hyperlipidemia 33（32.0%） 29（28.2%） 0.540*  *Diabetes 32（31.1%） 19（18.6%） 0.051*  Treatments (%)  *Depressor 28（27.2%） 25（24.3%） 0.642*  *lipid-lowering agents 10（9.7%） 4（3.9%） 0.109*  *Hypoglycemics 18（16.4%） 17（16.5%） 0.468*  DEXA T-scores  *L1–L4 -1.19±1.63 -3.06±1.27 <0.001*  *Femoral neck -1.32±0.97 -2.49±0.94 <0.001*  *Total hip -1.59±0.88 -1.93±1.07 0.229*  *Lowest overall -2.06± 0.99 -3.27±1.09 <0.001*  BMD  *L1–L4 0.87±0.17 0.71±0.15 <0.001*  *Femoral neck 0.67±0.11 0.57±0.11 <0.001*  *Total hip 0.75±0.18 0.72±0.14 0.019*  ***VBQ scores 3.35******±0.58 4.12±0.83 <0.001***  ***m-VBQ scores 3.07±0.59 3.88±0.86 <0.001*** |

Table3 Comparison of variables between patients with or without vertebral fracture
