# Supplementary material for: A novel modified VBQ Score，Correlation with the Vertebral Bone Quality Score, independently assessing for bone quality in patients with Osteoporosis Vertebral Fracture
Source: Research Square preprint supplement (doi:10.21203/rs.3.rs-4695580/v1), 2024-10-16
Supplement: Supplementary file 2 [file 63ae7cd54b01daf3ecf80bc9.docx]

| Distribution of spinal diseases in non-fracture group patients Number (Proportion)   | Lumbar disc herniation 33（32.1%） | | --- | | Lumbar spinal stenosis 15（14.5%） | | Lumbar spondylolisthesis: 6 （5.8%） |   No spinal disease: 49（47.5%） |
| --- | --- | --- | --- |

Table2 Spinal Disease Distribution Table for Non-Fracture Group Patients.
