# Supplementary material for: A novel modified VBQ Score，Correlation with the Vertebral Bone Quality Score, independently assessing for bone quality in patients with Osteoporosis Vertebral Fracture
Source: Research Square preprint supplement (doi:10.21203/rs.3.rs-4695580/v1), 2024-10-16
Supplement: Supplementary file 3 [file 8f8ec1aa099c5958276f04fb.docx]

| Vertebral scoring site Linear regression formula Correlation- Coefficient (r) P |
| --- |
| Total  Y = 0.8076*X + 0.9251 0.842 <0.001  T3-T11 Y = 0.5533*X + 2.097 0.662 <0.001  T12 Y = 0.8372*X + 0.8760 0.870 <0.001  L1 Y = 0.8308*X + 0.7817 0.886 <0.001  **L2 Y = 0.9757*X + 0.1291 0.951 <0.001**  L3-L5 Y = 0.9671*X + 0.3886 0.944 <0.001 |

Table4 Correlation between VBQ scores and m-VBQ scores, grouped by Vertebral scoring site

Abbreviation: X：m-VBQ Score，modified vertebral bone quality Score；Y:VBQ, vertebral bone quality Score
