# Supplementary material for: A novel modified VBQ Score，Correlation with the Vertebral Bone Quality Score, independently assessing for bone quality in patients with Osteoporosis Vertebral Fracture
Source: Research Square preprint supplement (doi:10.21203/rs.3.rs-4695580/v1), 2024-10-16
Supplement: Supplementary file 4 [file 911db1b68b6a0bbb8e4d4c73.docx]

| Vertebral scoring site Number (Proportion) VBQ Score m-VBQ Score  (fracture group) |
| --- |
| T3 1（0.9%） 4.55 4.05 |
| T5 1（0.9%） 3.95 3.57 |
| T7 1（0.9%） 4.39 4.22 |
| T8 4（3.8%） 4.31±0.54 3.34±0.42 |
| T9 2（1.9%） 3.62±0.35 3.19±1.20 |
| T10 2（1.9%） 3.38±1.03 3.08±0.20 |
| T11 4（3.8%） 4.82±0.78 5.17±0.56 |
| **T3-T11 15(14.5%) 4.22±0.74 3.89±0.97** |
| **T12 20（19.4%） 4.36±0.91 3.96±0.98** |
| **L1 36（34.9%） 4.08±0.69 3.88±0.75** |
| **L2 19（18.4%） 3.78±0.95 3.72±0.92** |
| L3 7（6.7%） 3.88±0.68 3.66±0.68 |
| L4 4（3.8%） 4.96±1.08 4.54±1.04 |
| L5 2（1.9%） 4.07±0.79 3.98±0.63 |
| **L3-L5 13 (12.6%) 4.24±0.91 3.98±0.83** |
| Vertebral scoring site Number (Proportion) VBQ Score m-VBQ Score  (non-fracture group) |
| T3 1（0.9%） 4.39 2.37 |
| T5 1（0.9%） 3.76 3.35 |
| T7 1（0.9%） 3.47 2.53 |
| T8 4（3.8%） 3.58±1.13 2.75±0.54 |
| T9 2（1.9%） 3.61±0.77 2.60±0.61 |
| T10 2（1.9%） 4.20±0.14 3.19±0.12 |
| T11 4（3.8%） 3.04±0.63 2.98±0.72 |
| **T3-T11 15(14.5%) 3.62±0.76 2.93±0.51** |
| **T12 20（19.4%） 3.21±0.55 3.27±0.55** |
| **L1 36（34.9%） 3.43±0.50 3.19±0.51** |
| **L2 19（18.4%） 3.22±0.51 3.28±0.43** |
| L3 7（6.7%） 3.48±0.42 2.57±0.19 |
| L4 4（3.8%） 3.13±0.26 2.40±0.01 |
| L5 2（1.9%） 2.50±0.34 3.98±0.63 |
| **L3-L5 13 (12.6%) 3.22±0.49 2.71±0.46** |

Table 1: VBQ and m-VBQ Scores of Included Patients Based on Vertebral Scoring Location
