# Supplementary material for: A novel modified VBQ Score，Correlation with the Vertebral Bone Quality Score, independently assessing for bone quality in patients with Osteoporosis Vertebral Fracture
Source: Research Square preprint supplement (doi:10.21203/rs.3.rs-4695580/v1), 2024-10-16
Supplement: Supplementary file 5 [file d0b53d075328c5ab671546c5.docx]

| Threshold Sensitivity Specificity AUC P |
| --- |
| Total VBQ 4.010 0.544 0.932 0.780 ＜0.001  **Total m-VBQ 3.256 0.786 0.612 0.776 ＜0.001**  T3-T11 VBQ 3.815 0.800 0.571 0.707 0.058  T3-T11 m-VBQ 3.145 0.800 0.857 0.855 0.001  T12VBQ 4.115 0.600 1.000 0.860 ＜0.001  T12 m-VBQ 3.920 0.500 0.950 0.783 0.002  L1VBQ 3.915 0.611 0.944 0.789 ＜0.001  L1m-VBQ 3.785 0.556 0.889 0.762 ＜0.001  L2VBQ 3.700 0.556 0.842 0.693 0.045  L2m-VBQ 3.250 0.722 0.579 0.675 0.068  L3-L5VBQ 3.690 0.692 0.923 0.840 0.003  L3-L5m-VBQ 3.065 0.923 0.615 0.840 0.003 |

Table6: Area Under the Curve (AUC) of subgroups by vertebral scoring site demonstrated the ability of the m-VBQ score and VBQ score to identify patients with OVF.
