# Supplementary material for: A novel modified VBQ Score，Correlation with the Vertebral Bone Quality Score, independently assessing for bone quality in patients with Osteoporosis Vertebral Fracture
Source: Research Square preprint supplement (doi:10.21203/rs.3.rs-4695580/v1), 2024-10-16
Supplement: Supplementary file 6 [file d26e6913e3875a5fde1f84a2.docx]

| Vertebral scoring site ICC (95% CI) P |
| --- |
| Total 0.841 (0.796,0.877) <0.001  T3-T11 0.652 (0.386,0.818) <0.001  T12 0.870 (0.767,0.929) <0.001  L1 0.884 (0.821,0.926) <0.001  **L2 0.950 (0.907,0.974) <0.001**  L3-L5 0.943 (0.878,0.974) <0.001 |

Table5: Analysis of Intra-group Correlation Coefficients for VBQ Scores Across Different Vertebral Scoring Sites.
